# Supplementary material for: Copper nanocrystalline-doped folic acid-based super carbon dots for an enhanced antitumor effect in response to tumor microenvironment stimuli
Source: Royal Society of Chemistry journal article supplement (doi:10.1039/d2tb01363k), 2022-01-01
Supplement: d2tb01363k1.pdf [file d2tb01363k1.pdf]

## Supplementary material

# Copper nanocrystalline-doped folic acid-based super carbon dots for enhanced antitumor effect in response to tumor microenvironment stimuli

Qing Xia<sup>a</sup>, Ying Zhang<sup>a</sup>, Hui Zhang<sup>b</sup>, Xiong Zhang<sup>a</sup>, Xiaodan Wu<sup>a</sup>, Zhiqiang Wang<sup>a,\*</sup>,  
Rui Yan<sup>a,\*</sup>, Yingxue Jin<sup>a,b,\*</sup>

<sup>a</sup> Key Laboratory for Photonic and Electronic Bandgap Materials, Ministry of Education, College of Chemistry & Chemical Engineering, Harbin Normal University, Harbin, 150025, China.

<sup>b</sup> Key Laboratory of Molecular Cytogenetics and Genetic Breeding of Heilongjiang province, College of Life Science and Technology, Harbin Normal University, Harbin, 150025, China.

**\*Corresponding author.** E-mail: jyxprof@163.com (Y. X. Jin), wzq70402@163.com (Z. Q. Wang), yanrui-1981@163.com (R. Yan).

## Content

|                                                                                                                                                                                                                                                                |    |
|----------------------------------------------------------------------------------------------------------------------------------------------------------------------------------------------------------------------------------------------------------------|----|
| 1. Study of Photothermal effect. Fig.S1. Plot of cooling time versus negative natural logarithm of the temperature driving force obtained from the cooling period. The time constant $\tau_s$ for heat transfer of the system was determined to be 261.        | S3 |
| 2. Fig. S2. High resolution XPS spectra.                                                                                                                                                                                                                       | S3 |
| 3. Singlet oxygen quantum yield test.<br>Table S1 The record data for the calculation of $^1\text{O}_2$ of different sample.                                                                                                                                   | S4 |
| 4. Hemolysis test. Table S2 The absorbance of each group and hemolysis rate of Fa-CD@Cu <sup>x</sup>                                                                                                                                                           | S5 |
| 5. Fig. S3: Change in size of FA-CDs@Cu <sup>x</sup> in H <sub>2</sub> O, PBS (pH 7.4), DMEM (10%FBS) from 0 to 15 days.                                                                                                                                       | S6 |
| 6. Fig. S4: a) Temperature change curves of FA-CDs irradiated by light (808 nm, 1 W/cm <sup>2</sup> ) at different concentrations; b) Temperature change curve of 200 $\mu\text{g}/\text{mL}$ FA-CDs@Cu <sup>x</sup> under different light source irradiation. | S6 |

|                                                                                                                                  |    |
|----------------------------------------------------------------------------------------------------------------------------------|----|
| 7. Fig. S5: 4T1 Cytophagy and targeting.                                                                                         | S6 |
| 8. Fig. S6: a) MTT assay to detect the toxicity of FA-CDs@Cu <sup>x</sup> on 4T1 cells; b) Live-dead cell staining of 4T1 cells. | S7 |
| 9. Fig. S7 In vivo fluorescence imaging of FA-CDs@Cu <sup>x</sup> at different intervals (0,2,4,8,12 h)                          | S7 |

## 1. Study of Photothermal effect

The photothermal conversion efficiency was evaluated by recording the temperature change of FA-CD@Cu<sup>x</sup> (400 µg/mL) with prolonged time under 808 nm laser irradiation at a power density of 1.0 W/cm<sup>2</sup>. The photothermal conversion efficiency  $\eta$  was calculated by equation (1), referring to previous literature

$$\eta = \frac{hA(T_{max} - T_{surr}) - Q_{Dis}}{I(1 - 10^{-A_{\lambda}})} \quad (1)$$

where  $h$  is the heat transfer coefficient and  $A$  is the surface area of the vessel.  $T_{max}$  (50.2 °C) and  $T_{surr}$  (25 °C) denote the equilibrium temperature and ambient temperature, respectively.  $Q_{Dis}$  denotes the heat dissipation of light absorbed by the quartz cuvette as 54.0 mW.  $I$  is the incident laser power (1.0 W/cm<sup>2</sup>), and  $A_{\lambda}$  is the absorbance of FA-CDs@Cu<sup>x</sup> at 808 nm (0.445). The  $hA$  value can be calculated from equation (2).

$$\tau_s = \frac{m_D C_D}{hA} \quad (2)$$

where  $\tau_s$  is the sample system time constant,  $m_D$  and  $C_D$  are the mass (1 g) and heat capacity (4.2 J g<sup>-1</sup>) of deionized water as a solvent, respectively. To calculate  $\tau_s$ , the dimensionless parameter  $\theta$  should be obtained from the following equation (3).

$$\theta = \frac{\Delta T}{\Delta T_{max}} \quad (3)$$

where  $\Delta T$  is the temperature variation, which is the temperature difference between the solution temperature and the ambient temperature.  $\Delta T_{max}$  is the amount of temperature change at the maximum steady-state temperature. Therefore, using the linear time data of the cooling period for  $\ln(\theta)$  (Fig.S1),  $\tau_s = 261$  can be determined by equation (4).

$$t = -\tau_s \ln(\theta) \quad (4)$$

Therefore, it can be calculated that:

$$hA = \frac{1 \times 4.2 \times 1000}{261} = 16.09$$

$$\eta = \frac{16.09 \times (50.2 - 25) - 54}{1000 \times (1 - 10^{-0.445})} = 54.3\%$$

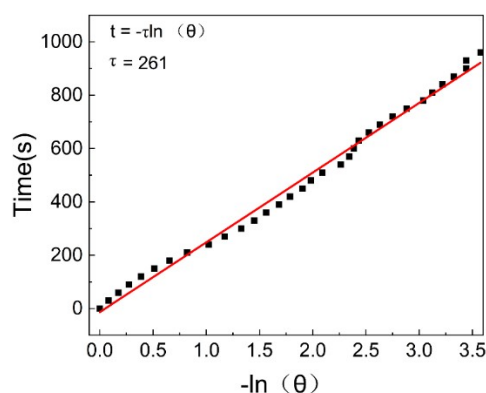

Fig.S1. Plot of cooling time versus negative natural logarithm of the temperature driving force obtained from the cooling period.

The time constant  $\tau_s$  for heat transfer of the system was determined to be 261.

## 2. High resolution XPS spectra of FA-CDs@Cu<sup>x</sup>

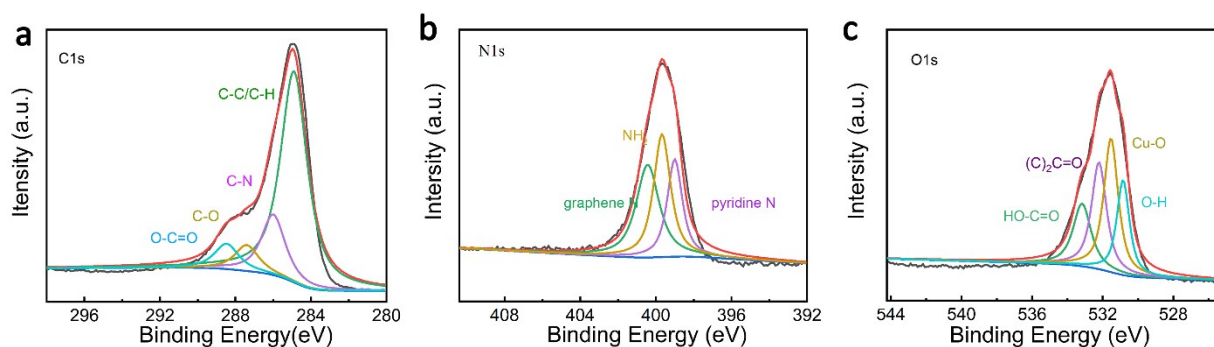

Fig.S2. a) XPS-deconvoluted C 1s; b) XPS spectrums as depicted in N 1s; c) XPS spectrums as depicted in O 1s

Carbon has four binding states of C=C/C-C, O=C-O, C-O, C-N (Fig. S2a). Nitrogen has three binding states: 398.7eV belonging to the pyridine N, 399.3 eV belonging to the -NH<sub>2</sub>, 401.1 eV belonging to the graphitized N (Fig. S2b). Oxygen has four binding states: O-H, O=C-O, Cu-O, and HO-C=O (Fig.S2c).

## 3. Singlet oxygen quantum yield test

Test procedure: 1,3-diphenylisobenzofuran (DPBF, 1 mg/mL dissolved in DMF) was used as <sup>1</sup>O<sub>2</sub> trapping agent, and the change of absorbance at 415 nm after oxidation of DPBF by ROS was detected by UV-Vis spectrometer (UV-Vis) to calculate the <sup>1</sup>O<sub>2</sub> quantum yield of FA-CDs@Cu<sup>x</sup>. Methylene blue (MB) was used as the control sample. First, the absorption of FA-CDs@Cu<sup>x</sup> and MB at 671 nm

was fixed at about 0.10 OD, and then DPBF (30  $\mu$ L) was added to each of the above solutions and irradiated with a 670 nm laser at a power density of 0.1 W/cm<sup>2</sup>. The decay rate of DPBF solution at 416 nm with irradiation time was calculated. The experimental data were listed in Table S1. We calculated the <sup>1</sup>O<sub>2</sub> quantum yields of CDs using Eq. (5).

$$\Phi_{FA-CDs@Cu^x} = \Phi_{MB} \frac{T_{MB}}{T_{FA-CDs@Cu^x}} \quad (5)$$

where  $T_{FA-CDs@Cu^x}$  and  $T_{MB}$  are the time for the DPBF absorption drop in the presence of CDs and MB (Fig. 3c), respectively.  $\Phi_{MB}$  is the <sup>1</sup>O<sub>2</sub> quantum yield of MB in DMF, given as 49%. The  $\Phi_{FA-CDs@Cu}$  was calculated as 56.8%.

Table S1 The record data for the calculation of <sup>1</sup>O<sub>2</sub> for different samples.

| Light(670 nm)                                    |                |                                     |                                                                       |                |                                     | Light(808 nm)                                                         |                |                                     |
|--------------------------------------------------|----------------|-------------------------------------|-----------------------------------------------------------------------|----------------|-------------------------------------|-----------------------------------------------------------------------|----------------|-------------------------------------|
| The absorption of DPBF at 416 nm (Containing MB) |                |                                     | The absorption of DPBF at 416 nm (Containing FA-CDs@Cu <sup>x</sup> ) |                |                                     | The absorption of DPBF at 416 nm (Containing FA-CDs@Cu <sup>x</sup> ) |                |                                     |
| t <sub>s</sub>                                   | A <sub>t</sub> | Ln(A <sub>0</sub> /A <sub>t</sub> ) | t <sub>s</sub>                                                        | A <sub>t</sub> | Ln(A <sub>0</sub> /A <sub>t</sub> ) | t <sub>s</sub>                                                        | A <sub>t</sub> | Ln(A <sub>0</sub> /A <sub>t</sub> ) |
| 0                                                | 1.038          | 0                                   | 0                                                                     | 1.038          | 0                                   | 0                                                                     | 1.05           | 0                                   |
| 10                                               | 0.967          | 0.0705                              | 10                                                                    | 0.949          | 0.0894                              | 10                                                                    | 0.904          | 0.1496                              |
| 20                                               | 0.919          | 0.1219                              | 20                                                                    | 0.905          | 0.1374                              | 20                                                                    | 0.849          | 0.2123                              |
| 30                                               | 0.889          | 0.1554                              | 30                                                                    | 0.858          | 0.1901                              | 30                                                                    | 0.809          | 0.2605                              |
| 40                                               | 0.838          | 0.2139                              | 40                                                                    | 0.857          | 0.1913                              | 40                                                                    | 0.769          | 0.3111                              |
| 50                                               | 0.808          | 0.2507                              | 50                                                                    | 0.806          | 0.2532                              | 50                                                                    | 0.729          | 0.3645                              |
| 60                                               | 0.798          | 0.2633                              | 60                                                                    | 0.767          | 0.3020                              | 60                                                                    | 0.689          | 0.4208                              |
| 70                                               | 0.767          | 0.3020                              | 70                                                                    | 0.727          | 0.3561                              | 70                                                                    | 0.649          | 0.4805                              |
| 80                                               | 0.707          | 0.3842                              | 80                                                                    | 0.726          | 0.3575                              | 80                                                                    | 0.599          | 0.5606                              |
| 90                                               | 0.673          | 0.4340                              | 90                                                                    | 0.706          | 0.3857                              | 90                                                                    | 0.563          | 0.6224                              |
| 100                                              | 0.651          | 0.4661                              | 100                                                                   | 0.684          | 0.4176                              | 100                                                                   | 0.544          | 0.6567                              |
| 110                                              | 0.624          | 0.5088                              | 110                                                                   | 0.671          | 0.4370                              | 110                                                                   | 0.519          | 0.7037                              |
| 120                                              | 0.586          | 0.5723                              | 120                                                                   | 0.634          | 0.4928                              | 120                                                                   | 0.490          | 0.7631                              |
| 130                                              | 0.555          | 0.6254                              | 130                                                                   | 0.617          | 0.5202                              | 130                                                                   | 0.450          | 0.8482                              |

#### 4. Hemolysis test of Fa-CDs@Cu<sup>x</sup>

Take 20 mL of fresh blood from rabbits and add 1 mL of 2% potassium oxalate saline solution to make fresh anticoagulant blood. Take 8 mL of anticoagulated blood and add it to 10 mL of saline to dilute. Then take 1 μg of Fa-CDs@Cu<sup>x</sup> and add it to 10 mL of saline, preheat it in a water bath at 37 °C for 30 min, then add 0.2 mL of diluted anticoagulated blood, mix it slowly and heat it in a water bath at 37 °C for 60 min. Take 10 mL of distilled water as a positive control, preheat it in a 37 °C water bath for 30 min, add 0.2 mL of diluted anticoagulant blood and mix slowly and heat it in a 37 °C water bath for 60 min. Take 10 mL of saline as a negative control, preheat it in a 37 °C water bath for 30 min, add 0.2 mL of diluted anticoagulant blood and heat it in a 37 °C water bath for 60 min. for 5 min (2500 rpm). The absorbance (OD) at 545 nm was recorded with a spectrophotometer and the hemolysis rate was calculated using the formula:

$$HR=(A_s-A_1)/(A_2-A_1) \times 100\%.$$

Where HR denotes the Hemolysis rate, A<sub>s</sub> denotes the absorbance of the experimental group, A<sub>1</sub> denotes the absorbance of the negative control group, and A<sub>2</sub> denotes the absorbance of the positive control group. The experiment was repeated three times, and the blood of different rabbits was taken each time. The mean absorbance of each group and the hemolysis rate of Fa-CDs@Cu<sup>x</sup> are listed in Table S2. No erythrocyte rupture was observed under the microscope by taking a small amount of the lower fluid containing erythrocytes

Table S2 The absorbance of each group and hemolysis rate of Fa-CD@Cu<sup>x</sup>

| Experience | Absorbance(OD) |                |                |
|------------|----------------|----------------|----------------|
|            | A <sub>s</sub> | A <sub>1</sub> | A <sub>2</sub> |
| I          | 0.014          | 0.013          | 0.097          |
| II         | 0.015          | 0.014          | 0.099          |
| III        | 0.013          | 0.012          | 0.098          |
| HR (%)     | 1.18%          |                |                |

#### 5. Fig.S3

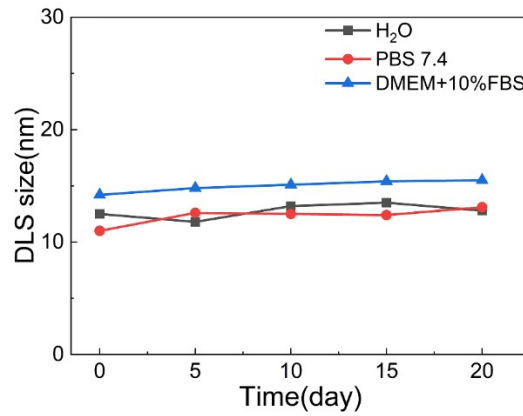

Fig.S3. Change in size of FA-CDs@Cu<sup>x</sup> in H<sub>2</sub>O, PBS (pH 7.4), DMEM (10%FBS).

## 6. Fig.S4

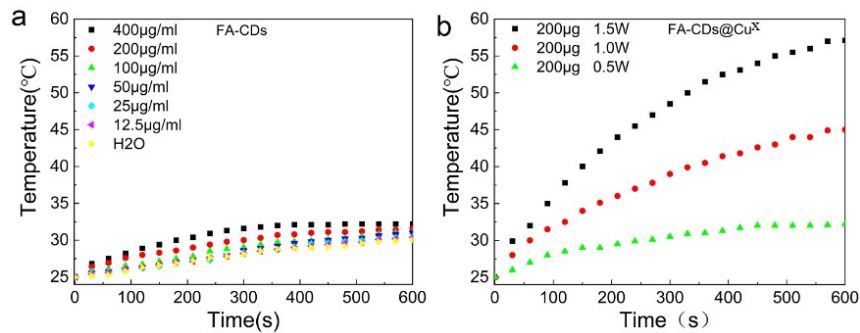

Fig.S4. a) Temperature change curves of FA-CDs irradiated by light (808 nm, 1 W/cm<sup>2</sup>) at different concentrations; b) Temperature change curve of 200 μg/mL FA-CDs@Cu<sup>x</sup> solutions under different light source irradiation

## 7. Fig.S5

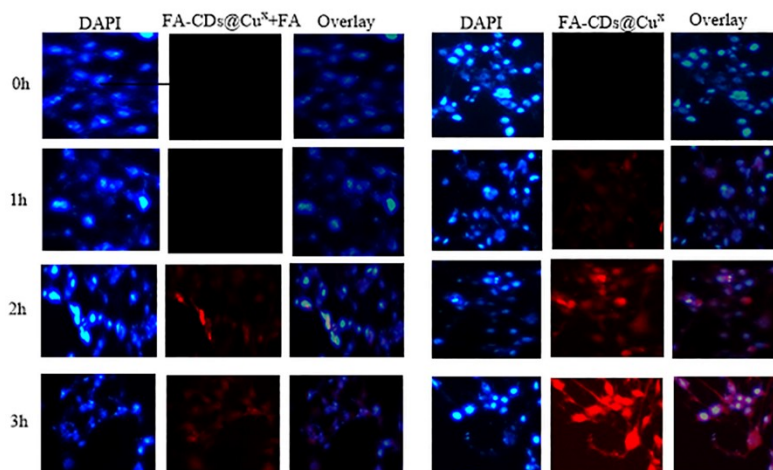

Fig.S5. 4T1 Cytophagy and targeting of Fa-CDs@Cu<sup>x</sup>

## 8. Fig.S6

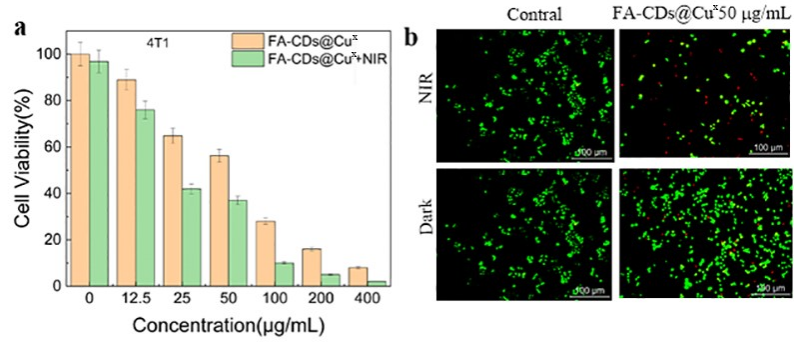

Fig.S6. a) MTT assay to detect the toxicity of FA-CDs@Cu<sup>x</sup> on 4T1 cells; b) Live-dead cell staining of 4T1 cells

### 9. Fig.S7

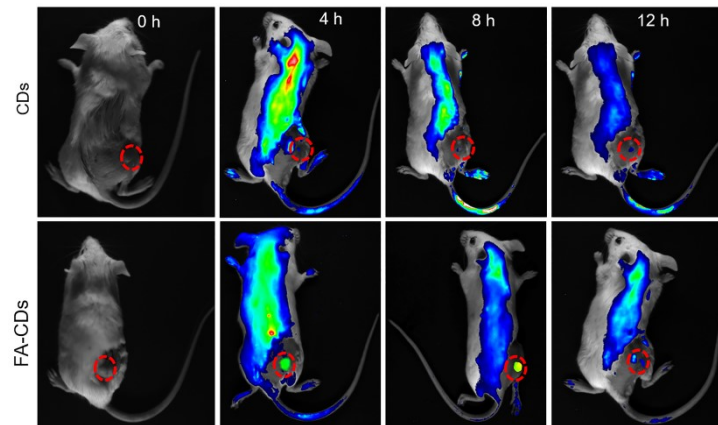

Fig. S7 In vivo fluorescence imaging of CDS and FA-CDS at different intervals (0,2,4,8,12 h)
